# Supplementary material
Source: Research Square preprint supplement (doi:10.21203/rs.3.rs-8962259/v1)
Supplement: Supplementary file 1 [file 4a2e12c9ed3851a80f161feb.docx]

# STROBE Statement – Checklist for Cross-Sectional Studies

**Manuscript Title:**

Health-promoting lifestyle behaviours and their association with antenatal depression and anxiety across pregnancy trimesters in Sri Lanka: a hospital-based cross-sectional study

| **Section / Item** | **Recommendation** | **Page No.** |
| --- | --- | --- |
| Title and Abstract 1(a) | Indicate the study design using a commonly accepted term (cross-sectional study) in the title or abstract. | Page 1 |
| Title and Abstract 1(b) | Provide an informative and balanced structured abstract summarizing background, methods, results, and conclusions. | Pages 1–2 |
| Introduction 2 | Explain the scientific background and rationale for the study, including existing evidence and knowledge gaps. | Pages 2–3 |
| Introduction 3 | State clearly the study objectives and prespecified hypotheses. | Page 3 |
| Methods 4 | Present key elements of the study design early in the Methods section. | Page 3 |
| Methods 5 | Describe the setting, location, hospitals involved, and recruitment period (January–June 2024). | Pages 3–4 |
| Methods 6(a) | Specify eligibility criteria, inclusion and exclusion criteria, and sampling method (non-probability convenience sampling). | Pages 4–5 |
| Methods 7 | Clearly define outcomes (EPDS, PASS), exposure variables (HPLP-II), predictors, trimester, and potential confounders. | Pages 6–7 |
| Methods 8 | Describe data sources and measurement methods, including instrument validity, scoring procedures, and cut-off values (EPDS ≥9; PASS ≥26). | Pages 6–8 |
| Methods 9 | Describe efforts to address bias, including exclusion criteria, supervised administration, and minimization of missing data. | Pages 4–6 |
| Methods 10 | Explain sample size calculation (Krejcie & Morgan formula; 95% CI; 5% margin of error; N=383). | Pages 4–5 |
| Methods 11 | Explain how quantitative variables were handled in analysis (continuous scores; trimester categorized; cut-offs defined). | Pages 8–9 |
| Methods 12(a) | Describe all statistical methods used, including correlation, regression, moderation (GLM), ANOVA, chi-square tests, and confounder adjustment. | Pages 8–10 |
| Methods 12(b) | Describe subgroup and interaction analyses, including trimester moderation testing. | Pages 9–10 |
| Methods 12(c) | Explain handling of missing data (minimal due to supervised collection; complete case analysis). | Page 6 |
| Methods 12(e) | Sensitivity analyses (none conducted; explicitly stated). | Not applicable |
| Results 13(a) | Report participant numbers at each stage (412 assessed; 383 included), supported by flow diagram. | Pages 5, 10 |
| Results 13(b) | Provide reasons for non-participation (declined participation). | Page 5 |
| Results 14(a) | Present descriptive characteristics of participants (demographic and clinical variables). | Page 10 |
| Results 15 | Report outcome data and summary measures (means, SD, prevalence, regression coefficients). | Pages 11–12 |
| Results 16(a) | Provide unadjusted and adjusted estimates with 95% confidence intervals. | Pages 1–2, 11–12 |
| Results 17 | Report subgroup analyses (trimester differences and interaction effects). | Page 12 |
| Discussion 18 | Summarize key findings in relation to study objectives. | Page 13 |
| Discussion 19 | Discuss study limitations and potential sources of bias. | Page 14 |
| Discussion 20 | Provide cautious interpretation considering study design and existing literature. | Pages 13–14 |
| Discussion 21 | Discuss generalizability to similar LMIC and tertiary-care contexts. | Page 14 |
| Other Information 22 | Declare funding source and role of funder. | Page 16 |
